# Supplementary material for: Solvent-mediated molar conductivity of protic ionic liquids
Source: Royal Society of Chemistry journal article supplement (doi:10.1039/c4cp04591b), 2014-11-05

## Electronic Supporting Information

### Solvent - Mediated Molar Conductivity of Protic Ionic Liquids

Sachin Thawarkar, Nageshwar D. Khupse, Anil Kumar\*

Physical Chemistry Division, National Chemical Laboratory, Dr. Homi Bhabha Road, Pune,  
India 411008

Email: [a.kumar@ncl.res.in](mailto:a.kumar@ncl.res.in)

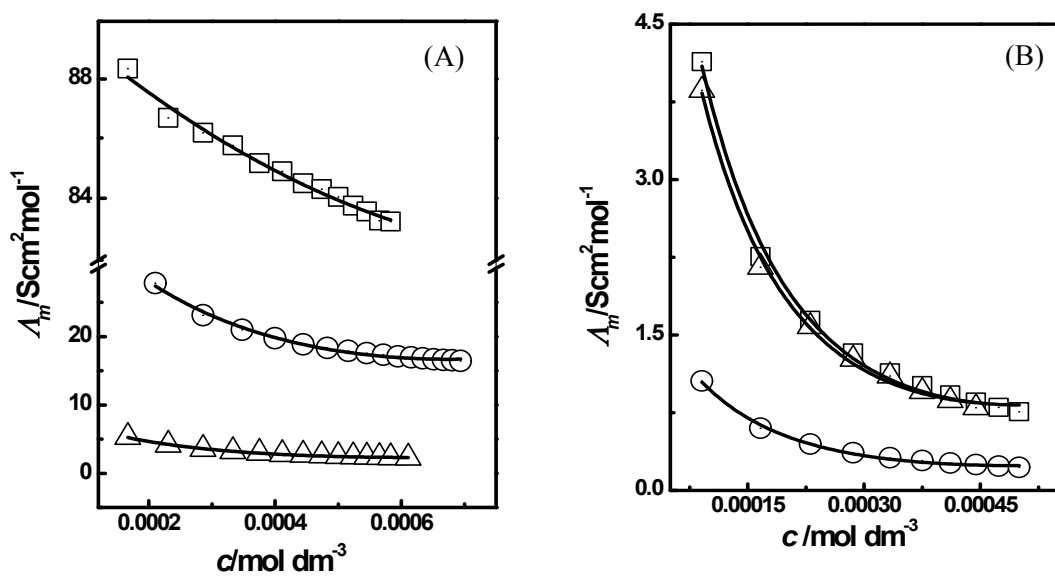

**Fig. S1** (A)  $\Lambda_m$  of  $[\text{HmIm}][\text{CH}_3\text{COO}]$  in water ( $\square$ ), methanol ( $\circ$ ), ethanol ( $\triangle$ ), (B)  $\Lambda_m$  of  $[\text{HmIm}][\text{CH}_3\text{COO}]$  in dimethyl sulfoxide ( $\square$ ), acetonitrile ( $\circ$ ), nitrobenzene ( $\triangle$ ) at 298.15 K.

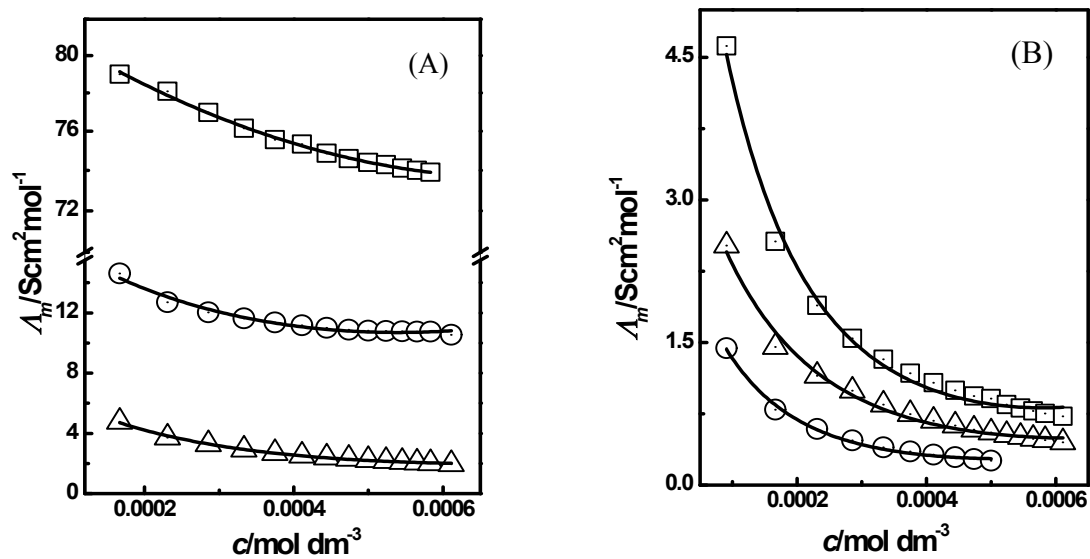

**Fig.S2** (A)  $\Lambda_m$  of  $[\text{HmIm}][\text{CH}_3\text{CH}_2\text{COO}]$  in water ( $\square$ ), methanol ( $\circ$ ), ethanol ( $\triangle$ ), (B)  $\Lambda_m$  of  $[\text{HmIm}][\text{CH}_3\text{CH}_2\text{COO}]$  in dimethyl sulfoxide ( $\square$ ), acetonitrile ( $\circ$ ), nitrobenzene ( $\triangle$ ) at 298.15 K.

Table S1. Molar conductivities,  $\Lambda_m$  of [HmIm][HCOO] in water, methanol and ethanol at 298.15 K.

| Water                              |                                        | Methanol                           |                                        | Ethanol                            |                                        |
|------------------------------------|----------------------------------------|------------------------------------|----------------------------------------|------------------------------------|----------------------------------------|
| $c$<br>$10^{-4}$ (mol dm $^{-3}$ ) | $\Lambda_m$<br>(Scm $^2$ mol $^{-1}$ ) | $c$<br>$10^{-4}$ (mol dm $^{-3}$ ) | $\Lambda_m$<br>(Scm $^2$ mol $^{-1}$ ) | $c$<br>$10^{-4}$ (mol dm $^{-3}$ ) | $\Lambda_m$<br>(Scm $^2$ mol $^{-1}$ ) |
| 1.666                              | 106.362                                | 1.666                              | 55.114                                 | 1.666                              | 8.583                                  |
| 2.307                              | 103.050                                | 2.307                              | 52.652                                 | 2.307                              | 7.791                                  |
| 2.857                              | 101.193                                | 2.857                              | 47.604                                 | 2.857                              | 7.361                                  |
| 3.333                              | 99.997                                 | 3.333                              | 48.633                                 | 3.333                              | 7.128                                  |
| 3.749                              | 99.474                                 | 3.749                              | 47.950                                 | 3.749                              | 6.966                                  |
| 4.111                              | 99.725                                 | 4.111                              | 47.235                                 | 4.111                              | 6.850                                  |
| 4.444                              | 98.604                                 | 4.444                              | 46.647                                 | 4.444                              | 6.741                                  |
| 4.736                              | 98.387                                 | 4.736                              | 46.237                                 | 4.736                              | 6.684                                  |
| 4.999                              | 97.990                                 | 4.999                              | 46.204                                 | 4.999                              | 6.632                                  |
| 5.237                              | 97.910                                 | 5.237                              | 45.861                                 | 5.237                              | 6.594                                  |
| 5.454                              | 97.891                                 | 5.454                              | 45.618                                 | 5.454                              | 6.582                                  |
| 5.651                              | 97.742                                 | 5.651                              | 45.280                                 | 5.651                              | 6.554                                  |
| 5.832                              | 97.760                                 | 5.832                              | 45.227                                 | 5.832                              | 6.552                                  |
|                                    |                                        | 6.109                              | 44.355                                 | 6.109                              | 6.410                                  |

Table S2. Molar conductivities,  $\Lambda_m$  of [HmIm][HCOO] in w dimethyl sulfoxide, acetonitrile and nitrobenzene 298.15 K..

| Dimethyl sulfoxide                 |                                        | Acetonitrile                       |                                        | Nitrobenzene                       |                                        |
|------------------------------------|----------------------------------------|------------------------------------|----------------------------------------|------------------------------------|----------------------------------------|
| $c$<br>$10^{-4}$ (mol dm $^{-3}$ ) | $\Lambda_m$<br>(Scm $^2$ mol $^{-1}$ ) | $c$<br>$10^{-4}$ (mol dm $^{-3}$ ) | $\Lambda_m$<br>(Scm $^2$ mol $^{-1}$ ) | $c$<br>$10^{-4}$ (mol dm $^{-3}$ ) | $\Lambda_m$<br>(Scm $^2$ mol $^{-1}$ ) |
| 0.909                              | 5.203                                  | 0.909                              | 4.752                                  | 0.909                              | 1.012                                  |
| 1.666                              | 3.103                                  | 1.666                              | 4.339                                  | 1.666                              | 0.636                                  |
| 2.307                              | 2.410                                  | 2.307                              | 3.466                                  | 2.307                              | 0.533                                  |
| 2.857                              | 2.058                                  | 2.857                              | 3.097                                  | 2.857                              | 0.560                                  |
| 3.333                              | 1.812                                  | 3.333                              | 2.980                                  | 3.333                              | 0.561                                  |
| 3.749                              | 1.650                                  | 3.749                              | 2.920                                  | 3.749                              | 0.554                                  |
| 4.111                              | 1.542                                  | 4.111                              | 2.865                                  | 4.111                              | 0.559                                  |
| 4.444                              | 1.451                                  | 4.444                              | 2.824                                  | 4.444                              | 0.560                                  |
| 4.736                              | 1.380                                  | 4.736                              | 2.808                                  | 4.736                              | 0.584                                  |
| 4.999                              | 1.328                                  | 4.999                              | 2.802                                  | 4.999                              | 0.590                                  |
| 5.237                              | 1.279                                  | 5.237                              | 2.806                                  | 5.237                              | 0.592                                  |
| 5.454                              | 1.237                                  | 5.454                              | 2.810                                  | 5.454                              | 0.594                                  |
| 5.651                              | 1.203                                  | 5.651                              | 2.824                                  | 5.651                              | 0.594                                  |
| 5.832                              | 1.174                                  | 5.832                              | 2.834                                  | 5.832                              | 0.600                                  |
|                                    |                                        | 6.109                              | 2.793                                  | 6.109                              |                                        |

Table S3. Molar conductivities,  $\Lambda_m$  of [HmIm][CH<sub>3</sub>COO] in water, methanol and ethanol at 298.15 K..

| Water                                           |                                                      | Methanol                                        |                                                      | Ethanol                                         |                                                      |
|-------------------------------------------------|------------------------------------------------------|-------------------------------------------------|------------------------------------------------------|-------------------------------------------------|------------------------------------------------------|
| $c$<br>10 <sup>-4</sup> (mol dm <sup>-3</sup> ) | $\Lambda_m$<br>(Scm <sup>2</sup> mol <sup>-1</sup> ) | $c$<br>10 <sup>-4</sup> (mol dm <sup>-3</sup> ) | $\Lambda_m$<br>(Scm <sup>2</sup> mol <sup>-1</sup> ) | $c$<br>10 <sup>-4</sup> (mol dm <sup>-3</sup> ) | $\Lambda_m$<br>(Scm <sup>2</sup> mol <sup>-1</sup> ) |
| 1.666                                           | 88.355                                               | 2.105                                           | 27.835                                               | 1.666                                           | 5.294                                                |
| 2.307                                           | 86.670                                               | 2.857                                           | 23.108                                               | 2.307                                           | 4.129                                                |
| 2.856                                           | 86.177                                               | 3.478                                           | 20.966                                               | 2.857                                           | 3.535                                                |
| 3.333                                           | 85.746                                               | 3.999                                           | 19.736                                               | 3.333                                           | 3.189                                                |
| 3.749                                           | 85.153                                               | 4.444                                           | 18.869                                               | 3.749                                           | 2.955                                                |
| 4.111                                           | 84.888                                               | 4.827                                           | 18.312                                               | 4.111                                           | 2.797                                                |
| 4.444                                           | 84.496                                               | 5.161                                           | 17.903                                               | 4.444                                           | 2.668                                                |
| 4.736                                           | 84.304                                               | 5.454                                           | 17.551                                               | 4.736                                           | 2.571                                                |
| 4.999                                           | 84.048                                               | 5.713                                           | 17.331                                               | 4.999                                           | 2.496                                                |
| 5.237                                           | 83.761                                               | 5.945                                           | 17.123                                               | 5.237                                           | 2.428                                                |
| 5.454                                           | 83.571                                               | 6.153                                           | 16.966                                               | 5.454                                           | 2.381                                                |
| 5.651                                           | 83.268                                               | 6.341                                           | 16.811                                               | 5.651                                           | 2.344                                                |
| 5.832                                           | 83.237                                               | 6.511                                           | 16.694                                               | 5.832                                           | 2.307                                                |
|                                                 |                                                      | 6.666                                           | 16.591                                               | 6.109                                           | 2.240                                                |
|                                                 |                                                      | 6.807                                           | 16.510                                               |                                                 |                                                      |
|                                                 |                                                      | 6.938                                           | 16.430                                               |                                                 |                                                      |

Table S4. Molar conductivities,  $\Lambda_m$  of [HmIm][CH<sub>3</sub>COO] in dimethyl sulfoxide, acetonitrile and nitrobenzene 298.15 K..

| Dimethyl sulfoxide                              |                                                      | Acetonitrile                                    |                                                      | Nitrobenzene                                    |                                                      |
|-------------------------------------------------|------------------------------------------------------|-------------------------------------------------|------------------------------------------------------|-------------------------------------------------|------------------------------------------------------|
| $c$<br>10 <sup>-4</sup> (mol dm <sup>-3</sup> ) | $\Lambda_m$<br>(Scm <sup>2</sup> mol <sup>-1</sup> ) | $c$<br>10 <sup>-4</sup> (mol dm <sup>-3</sup> ) | $\Lambda_m$<br>(Scm <sup>2</sup> mol <sup>-1</sup> ) | $c$<br>10 <sup>-4</sup> (mol dm <sup>-3</sup> ) | $\Lambda_m$<br>(Scm <sup>2</sup> mol <sup>-1</sup> ) |
| 0.909                                           | 4.136                                                | 0.909                                           | 3.861                                                | 0.909                                           | 1.056                                                |
| 1.666                                           | 2.257                                                | 1.666                                           | 2.154                                                | 1.666                                           | 0.600                                                |
| 2.307                                           | 1.642                                                | 2.307                                           | 1.581                                                | 2.307                                           | 0.446                                                |
| 2.857                                           | 1.326                                                | 2.857                                           | 1.267                                                | 2.857                                           | 0.364                                                |
| 3.333                                           | 1.134                                                | 3.333                                           | 1.104                                                | 3.333                                           | 0.315                                                |
| 3.749                                           | 1.010                                                | 3.749                                           | 0.954                                                | 3.749                                           | 0.288                                                |
| 4.111                                           | 0.921                                                | 4.111                                           | 0.866                                                | 4.111                                           | 0.262                                                |
| 4.444                                           | 0.852                                                | 4.444                                           | 0.796                                                | 4.444                                           | 0.249                                                |
| 4.736                                           | 0.802                                                |                                                 |                                                      | 4.736                                           | 0.234                                                |
| 4.999                                           | 0.760                                                |                                                 |                                                      | 4.999                                           | 0.222                                                |

Table S5. Molar conductivities,  $\Lambda_m$  of [HmIm][CH<sub>3</sub>CH<sub>2</sub>COO] in water, methanol and ethanol at 298.15 K.

| Water                                           |                                                      | Methanol                                        |                                                      | Ethanol                                         |                                                      |
|-------------------------------------------------|------------------------------------------------------|-------------------------------------------------|------------------------------------------------------|-------------------------------------------------|------------------------------------------------------|
| $c$<br>10 <sup>-4</sup> (mol dm <sup>-3</sup> ) | $\Lambda_m$<br>(Scm <sup>2</sup> mol <sup>-1</sup> ) | $c$<br>10 <sup>-4</sup> (mol dm <sup>-3</sup> ) | $\Lambda_m$<br>(Scm <sup>2</sup> mol <sup>-1</sup> ) | $c$<br>10 <sup>-4</sup> (mol dm <sup>-3</sup> ) | $\Lambda_m$<br>(Scm <sup>2</sup> mol <sup>-1</sup> ) |
| 1.666                                           | 78.991                                               | 1.666                                           | 14.621                                               | 1.666                                           | 4.772                                                |
| 2.307                                           | 78.089                                               | 2.307                                           | 12.697                                               | 2.307                                           | 3.718                                                |
| 2.857                                           | 76.971                                               | 2.857                                           | 12.034                                               | 2.857                                           | 3.276                                                |
| 3.333                                           | 76.145                                               | 3.333                                           | 11.637                                               | 3.333                                           | 2.925                                                |
| 3.749                                           | 75.552                                               | 3.749                                           | 11.353                                               | 3.749                                           | 2.690                                                |
| 4.111                                           | 75.328                                               | 4.111                                           | 11.164                                               | 4.111                                           | 2.527                                                |
| 4.444                                           | 74.865                                               | 4.444                                           | 10.996                                               | 4.444                                           | 2.396                                                |
| 4.736                                           | 74.592                                               | 4.736                                           | 10.888                                               | 4.736                                           | 2.303                                                |
| 4.999                                           | 74.407                                               | 4.999                                           | 10.815                                               | 4.999                                           | 2.226                                                |
| 5.237                                           | 74.291                                               | 5.237                                           | 10.797                                               | 5.237                                           | 2.163                                                |
| 5.454                                           | 74.110                                               | 5.454                                           | 10.775                                               | 5.454                                           | 2.110                                                |
| 5.651                                           | 73.996                                               | 5.651                                           | 10.756                                               | 5.651                                           | 2.065                                                |
| 5.832                                           | 73.910                                               | 5.832                                           | 10.746                                               | 5.832                                           | 2.026                                                |
|                                                 |                                                      | 6.109                                           | 10.538                                               | 6.109                                           | 1.960                                                |

Table S6. Molar conductivities,  $\Lambda_m$  of [HmIm][CH<sub>3</sub>CH<sub>2</sub>COO] in dimethyl sulfoxide, acetonitrile and nitrobenzene at 298.15 K.

| Dimethyl sulfoxide                              |                                                      | Acetonitrile                                    |                                                      | Nitrobenzene                                    |                                                      |
|-------------------------------------------------|------------------------------------------------------|-------------------------------------------------|------------------------------------------------------|-------------------------------------------------|------------------------------------------------------|
| $c$<br>10 <sup>-4</sup> (mol dm <sup>-3</sup> ) | $\Lambda_m$<br>(Scm <sup>2</sup> mol <sup>-1</sup> ) | $c$<br>10 <sup>-4</sup> (mol dm <sup>-3</sup> ) | $\Lambda_m$<br>(Scm <sup>2</sup> mol <sup>-1</sup> ) | $c$<br>10 <sup>-4</sup> (mol dm <sup>-3</sup> ) | $\Lambda_m$<br>(Scm <sup>2</sup> mol <sup>-1</sup> ) |
| 0.909                                           | 4.620                                                | 0.909                                           | 2.519                                                | 0.909                                           | 1.441                                                |
| 1.666                                           | 2.563                                                | 1.666                                           | 1.452                                                | 1.666                                           | 0.792                                                |
| 2.307                                           | 1.889                                                | 2.307                                           | 1.148                                                | 2.307                                           | 0.589                                                |
| 2.857                                           | 1.543                                                | 2.857                                           | 0.994                                                | 2.857                                           | 0.469                                                |
| 3.333                                           | 1.323                                                | 3.333                                           | 0.846                                                | 3.333                                           | 0.396                                                |
| 3.749                                           | 1.176                                                | 3.749                                           | 0.746                                                | 3.749                                           | 0.352                                                |
| 4.111                                           | 1.075                                                | 4.111                                           | 0.676                                                | 4.111                                           | 0.321                                                |
| 4.444                                           | 0.996                                                | 4.444                                           | 0.625                                                | 4.444                                           | 0.292                                                |
| 4.736                                           | 0.935                                                | 4.736                                           | 0.584                                                | 4.736                                           | 0.272                                                |
| 4.999                                           | 0.910                                                | 4.999                                           | 0.554                                                | 4.999                                           | 0.256                                                |
| 5.237                                           | 0.847                                                | 5.237                                           | 0.527                                                |                                                 |                                                      |
| 5.454                                           | 0.810                                                | 5.454                                           | 0.507                                                |                                                 |                                                      |
| 5.651                                           | 0.780                                                | 5.651                                           | 0.486                                                |                                                 |                                                      |
| 5.832                                           | 0.754                                                | 5.832                                           | 0.473                                                |                                                 |                                                      |
| 6.109                                           | 0.721                                                | 6.109                                           | 0.448                                                |                                                 |                                                      |

## <sup>1</sup>H-NMR of Ionic Liquids

<sup>1</sup>H NMR, 200 MHz, CDCl<sub>3</sub>: 1-methylimidazolium formate, [HmIm][HCOO] δ 15.32 (s, 1H), δ 7.73 (s, 1H), δ 6.98 (s, 1H), δ 6.83 (s, 1H), δ 3.60 (s, 3H).

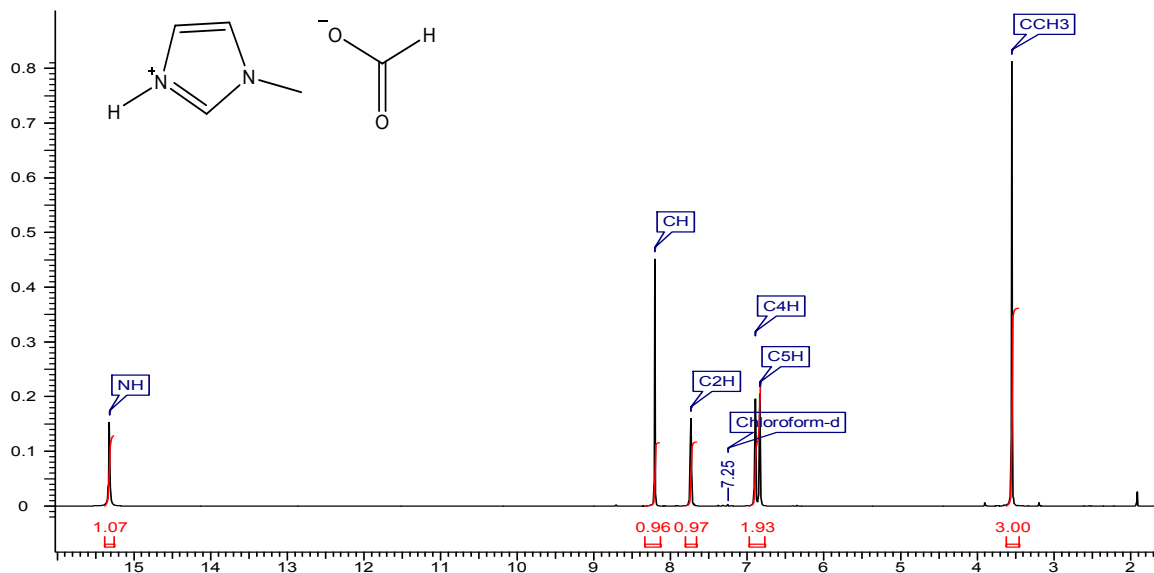

<sup>1</sup>H NMR, 200 MHz, CDCl<sub>3</sub>: 1-methylimidazolium acetate, [HmIm][CH<sub>3</sub>COO], δ 14.25 (s, 1H), δ 7.55 (s, 1H), δ 6.96 (s, 1H), δ 6.80 (s, 1H), δ 3.60 (s, 3H), δ 1.95 (t, 3H).

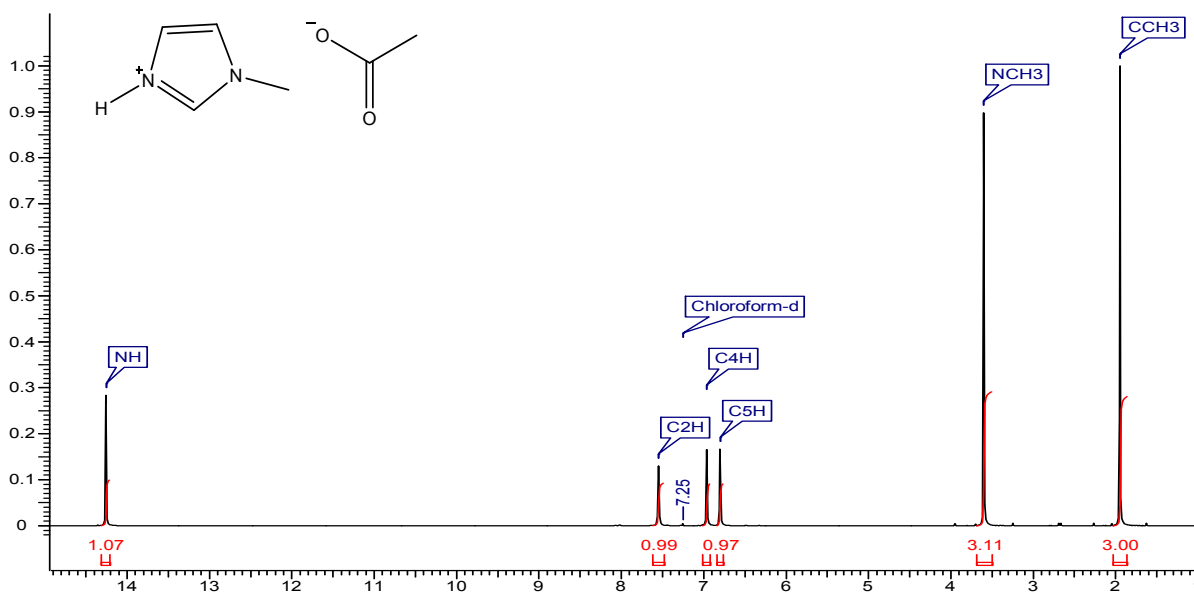

$^1\text{H}$  NMR, 200 MHz,  $\text{CDCl}_3$ : 1-methylimidazolium propionate,  $[\text{HmIm}][\text{CH}_3\text{CH}_2\text{COO}]$ ,  $\delta$  13.72 (s, 1H),  $\delta$  7.52 (s, 1H),  $\delta$  6.92 (s, 1H),  $\delta$  6.76 (s, 1H),  $\delta$  3.51 (s, 3H),  $\delta$  2.21 (q, 2H),  $\delta$  0.96 (t, 3H).

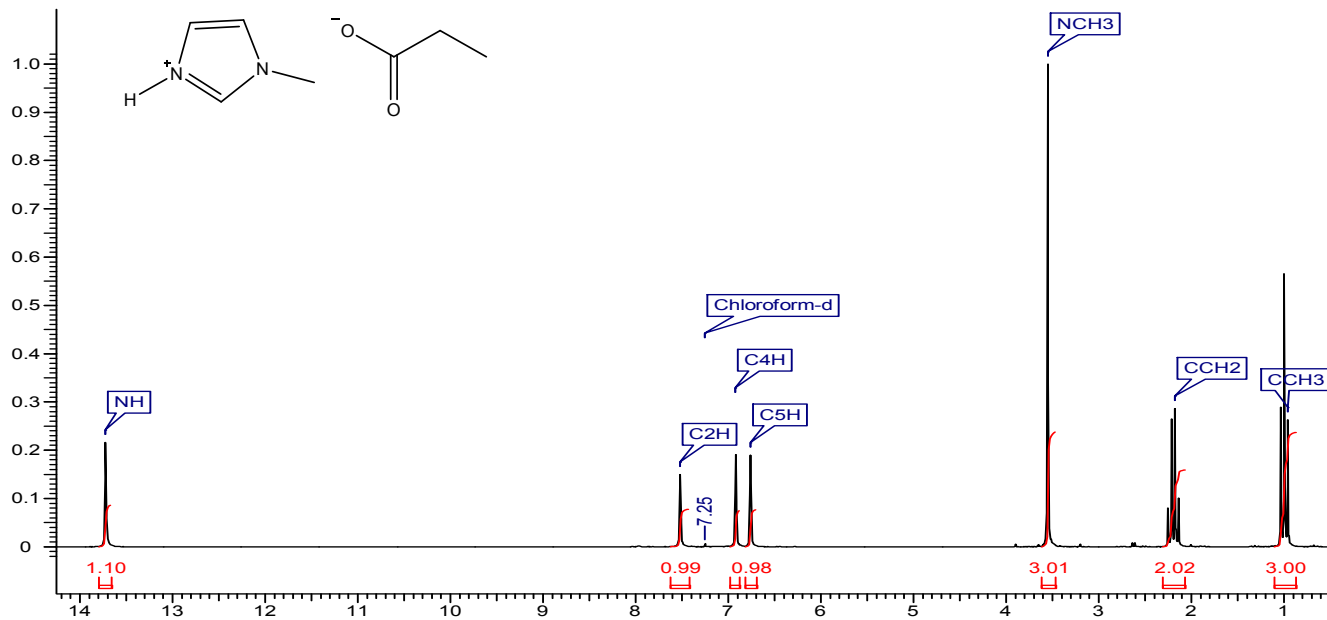

Supplement: c4cp04591b1.pdf [file c4cp04591b1.pdf]
